# Supplementary material for: Quantitative proteomic analysis of Rett iPSC-derived neuronal progenitors
Source: PubMed Central journal article supplement (PMC7251722; doi:10.1186/s13229-020-00344-3), 2020-05-27

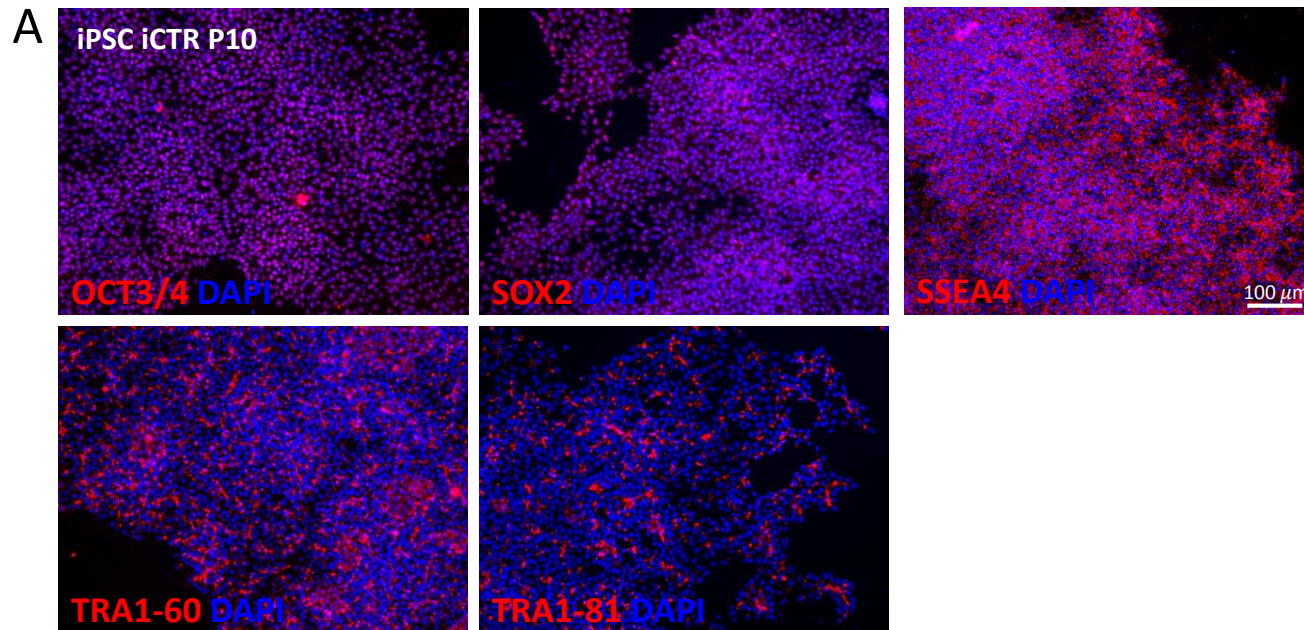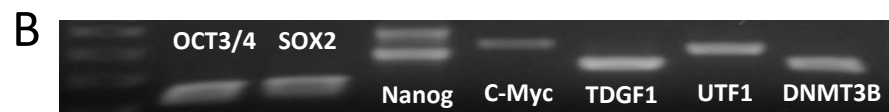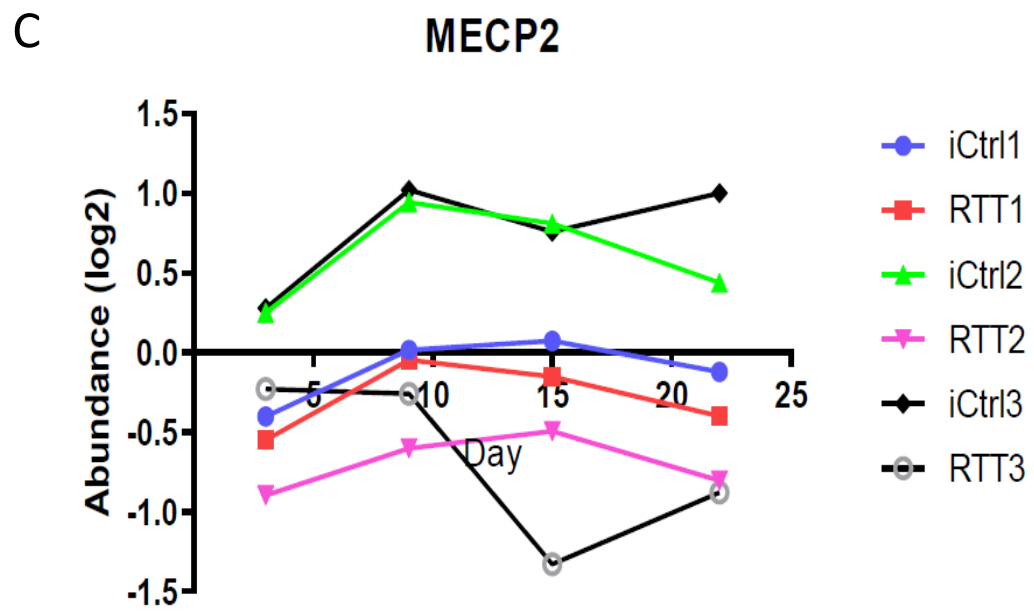

Supplement: 13229_2020_344_MOESM1_ESM.pdf [file 13229_2020_344_MOESM1_ESM.pdf]
