# Supplementary material for: Quantitative proteomic analysis of Rett iPSC-derived neuronal progenitors
Source: PubMed Central journal article supplement (PMC7251722; doi:10.1186/s13229-020-00344-3), 2020-05-27

A

Down regulated in RTT

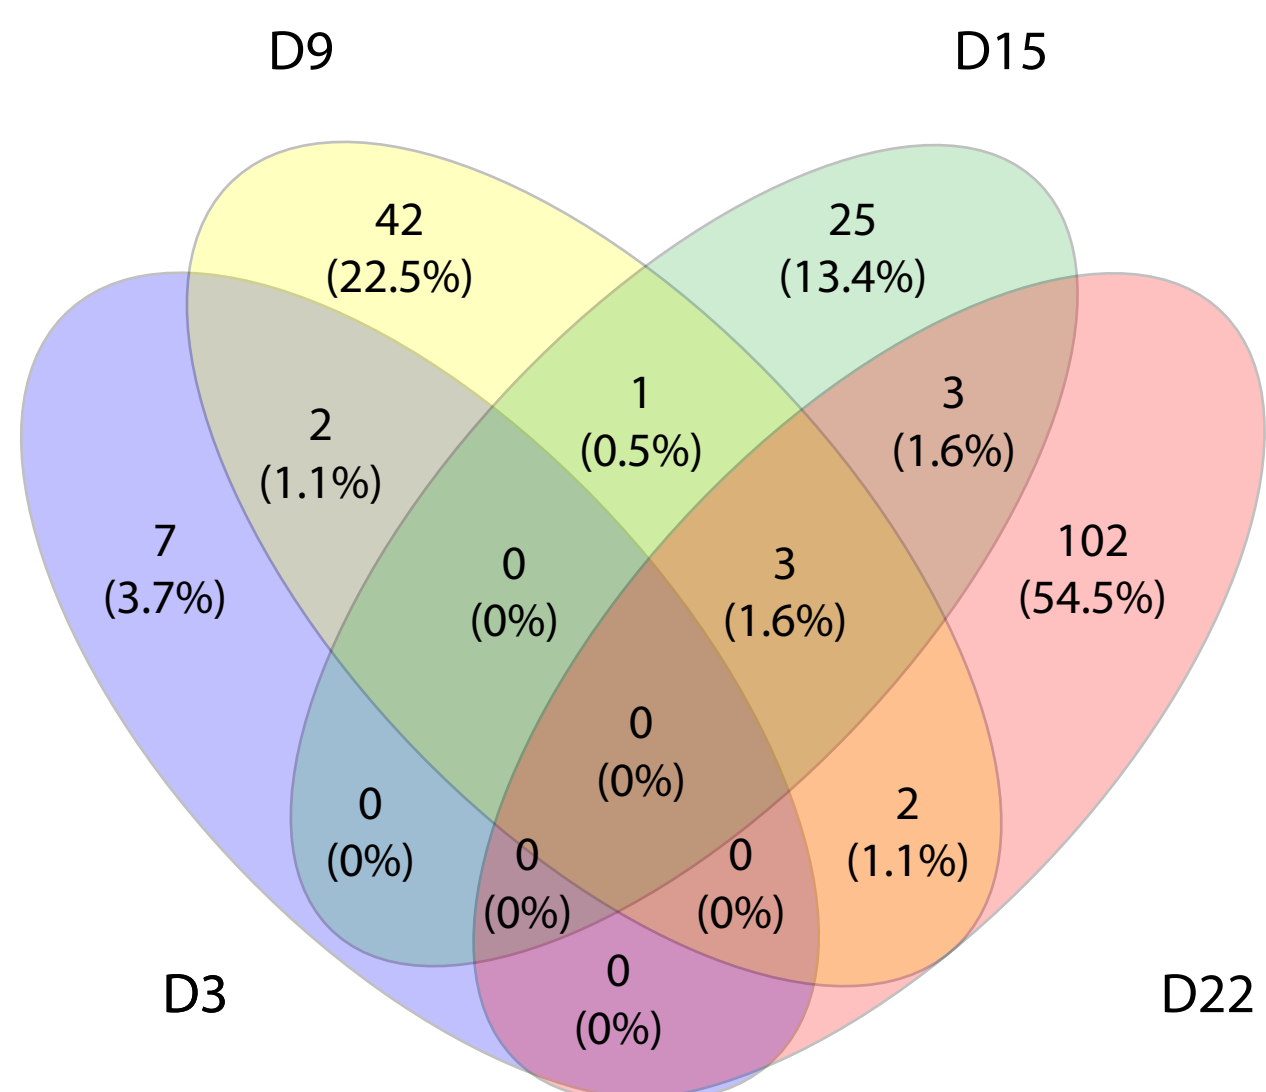

B Up regulated in RTT

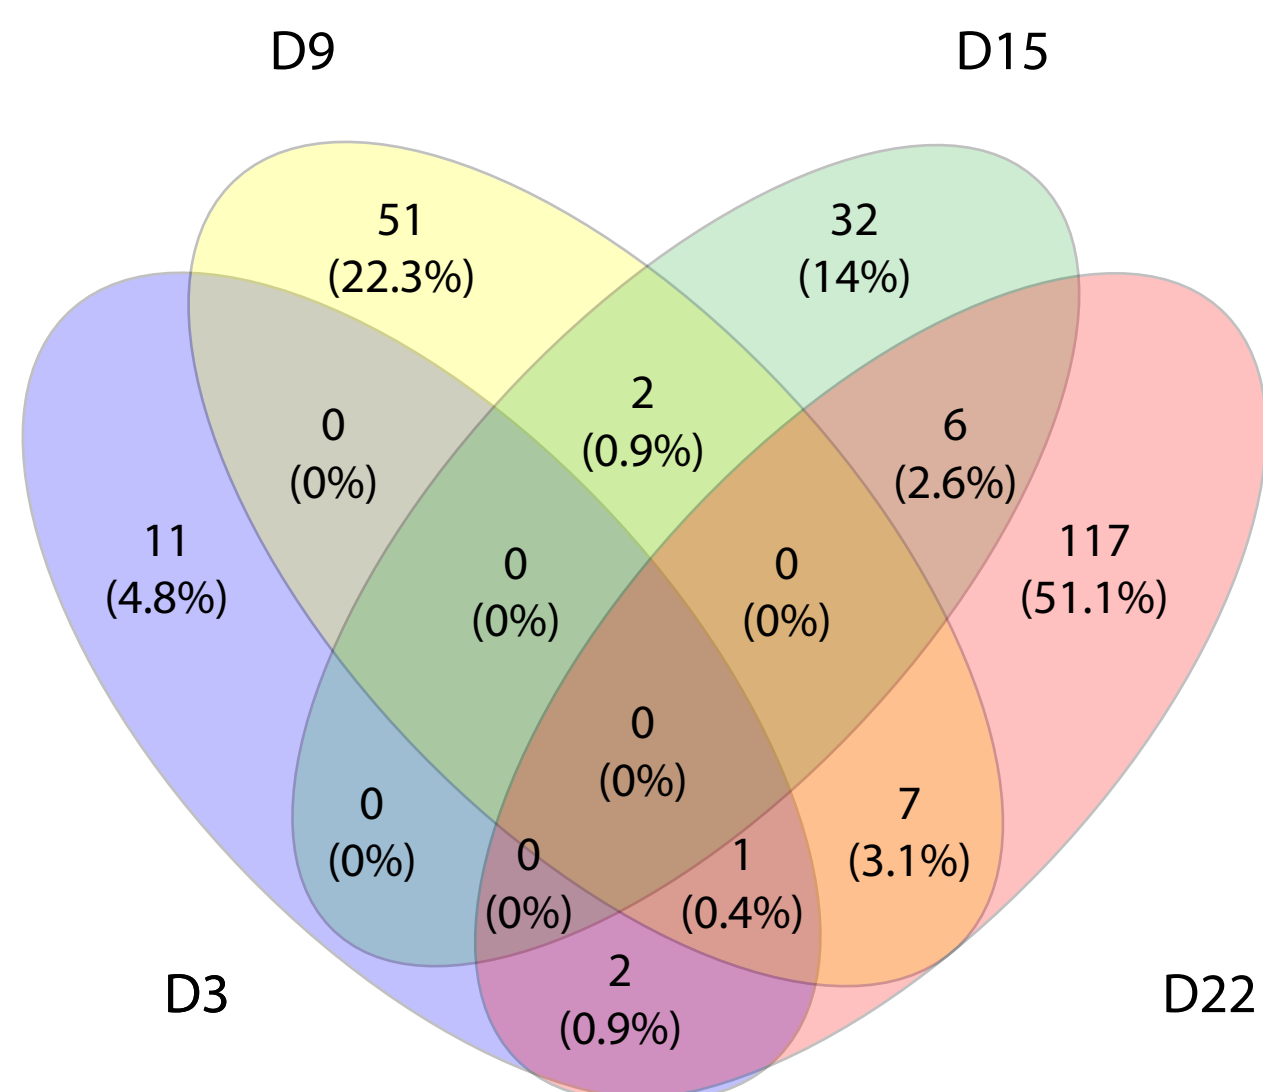

D3

9 proteins down in RTT

14 proteins up in RTT

D9

50 proteins down in RTT

61 proteins up in RTT

D15

32 proteins down in RTT

40 proteins up in RTT

D22

110 proteins down in RTT

133 proteins up in RTT

C

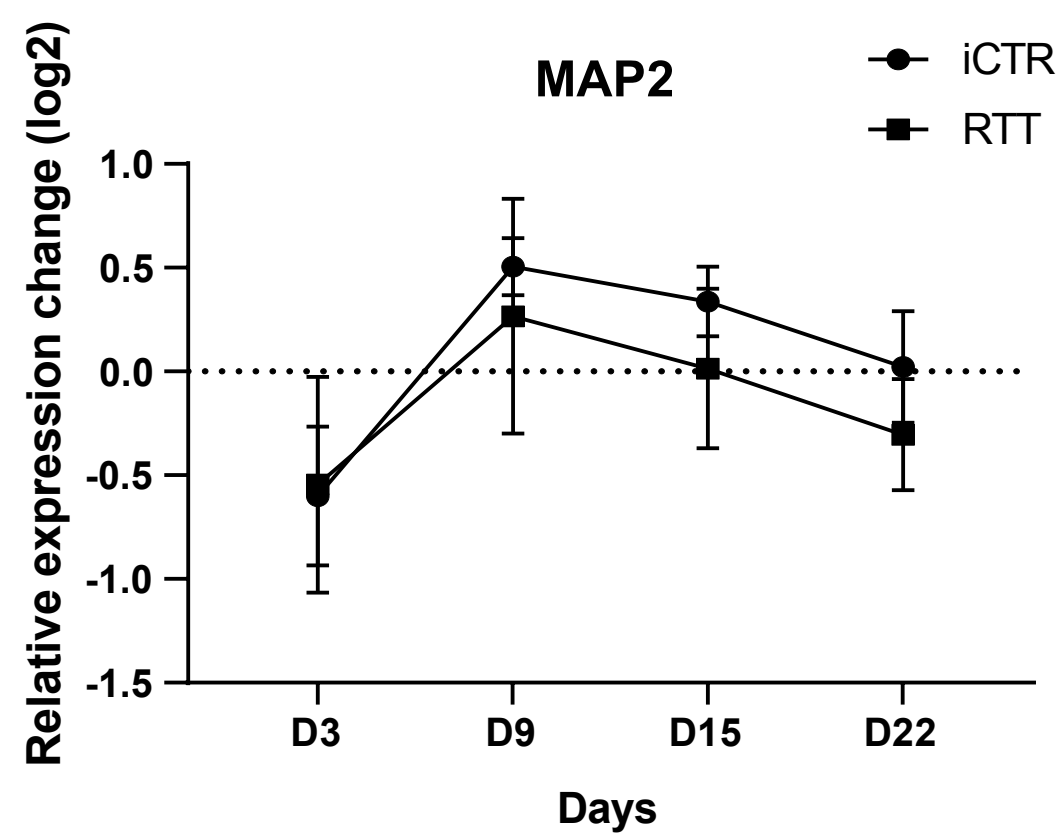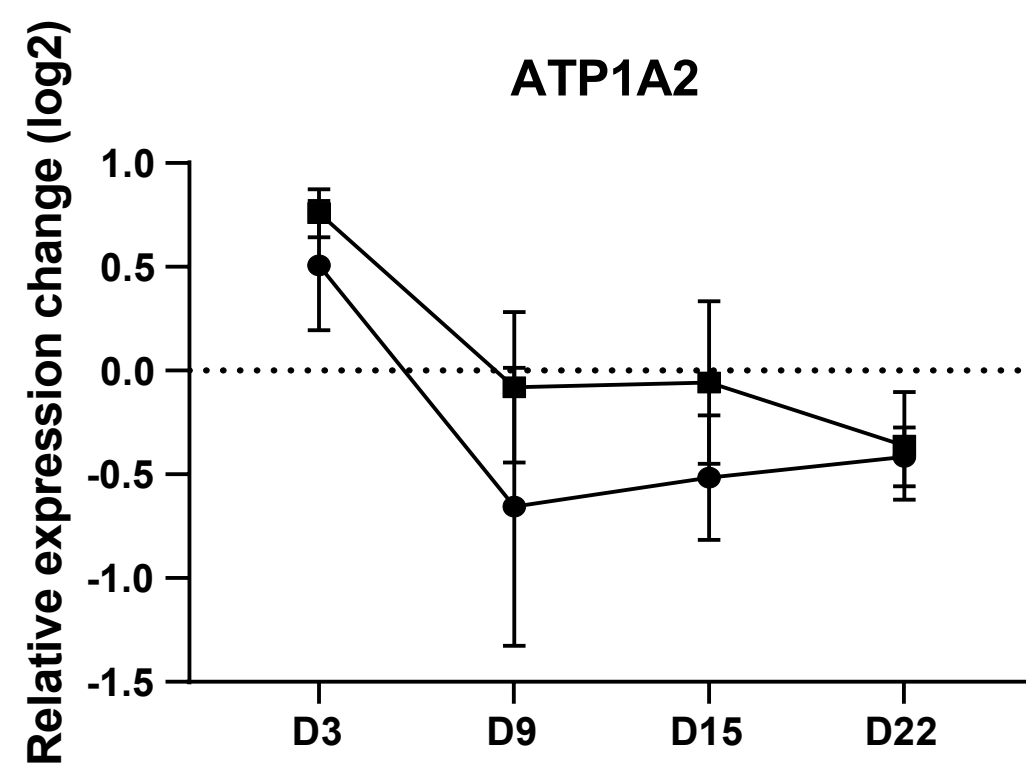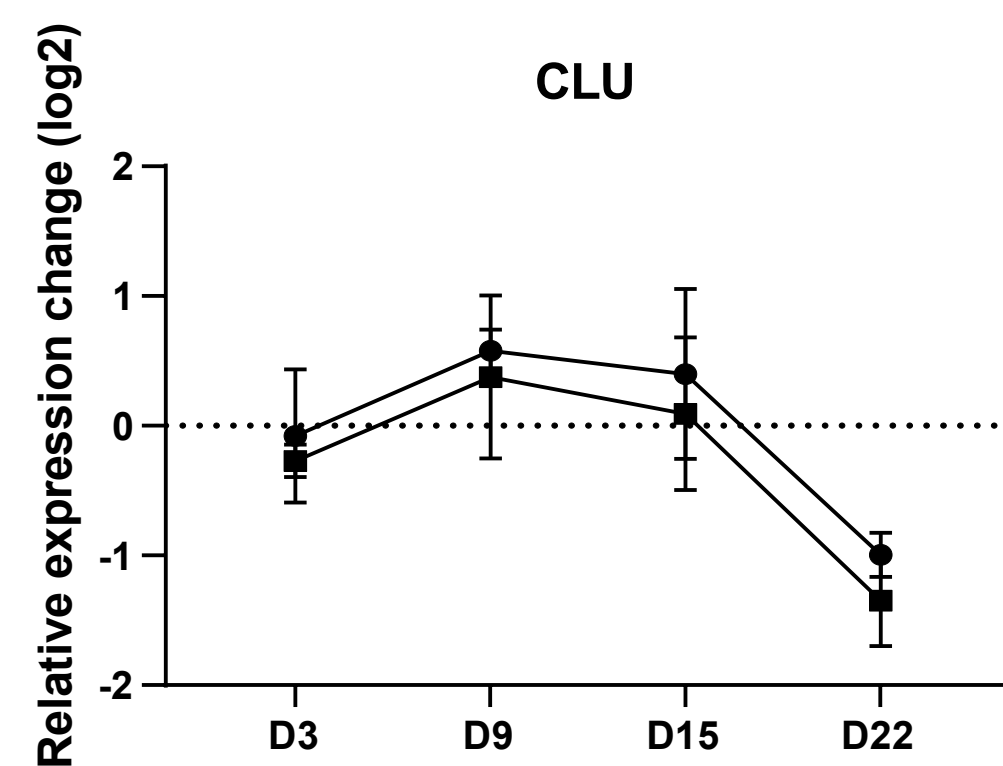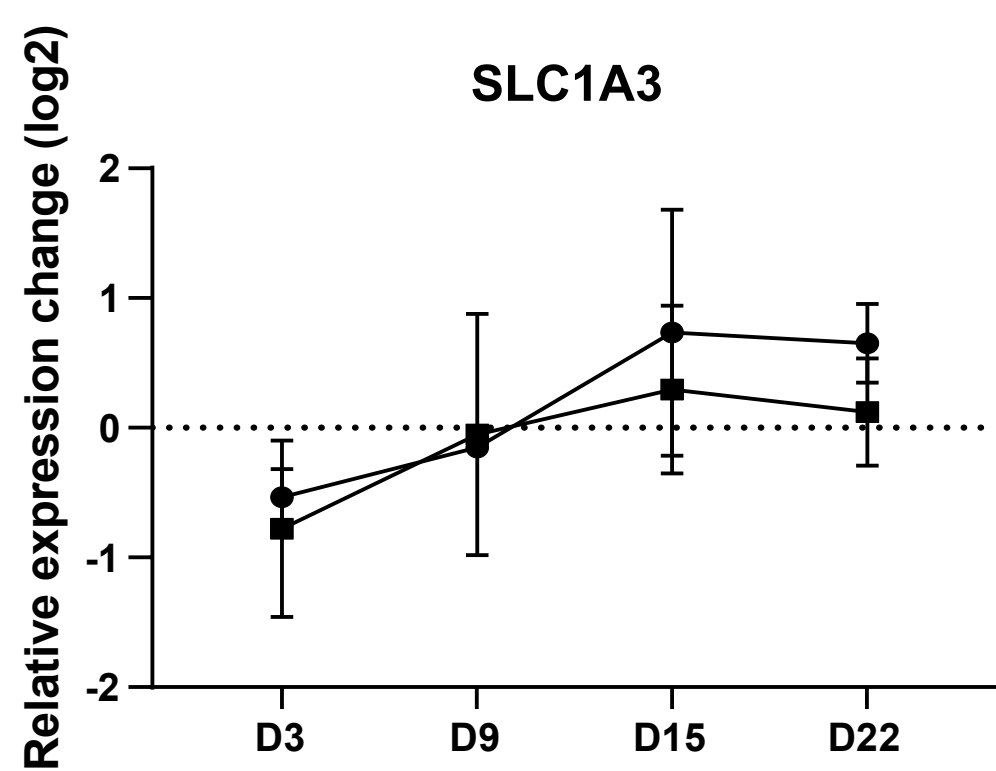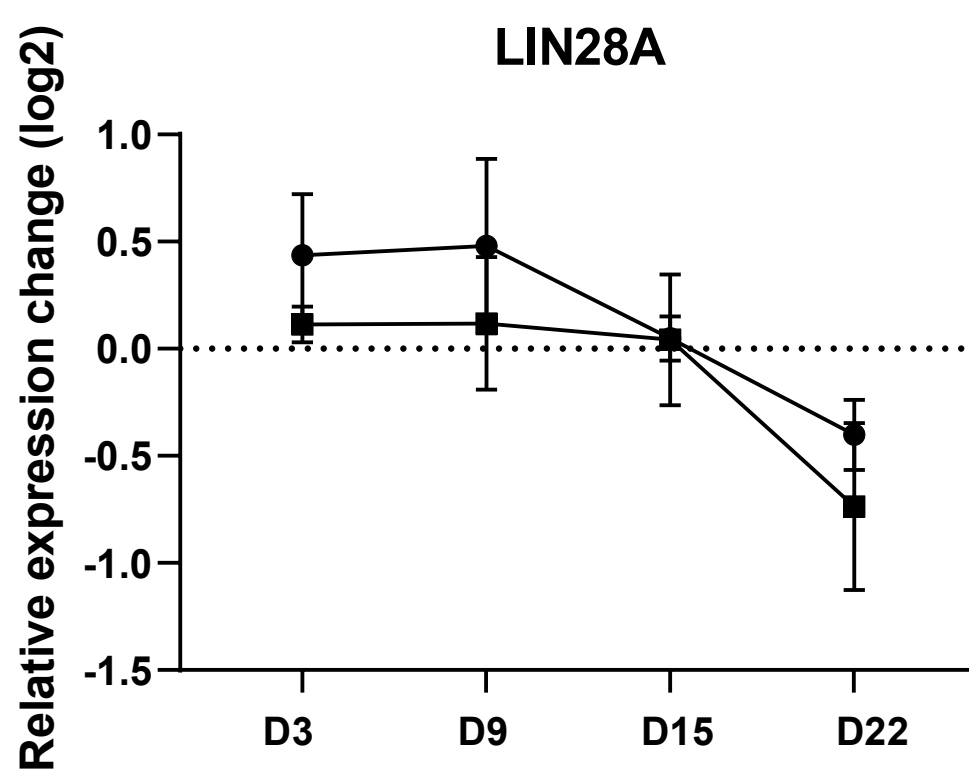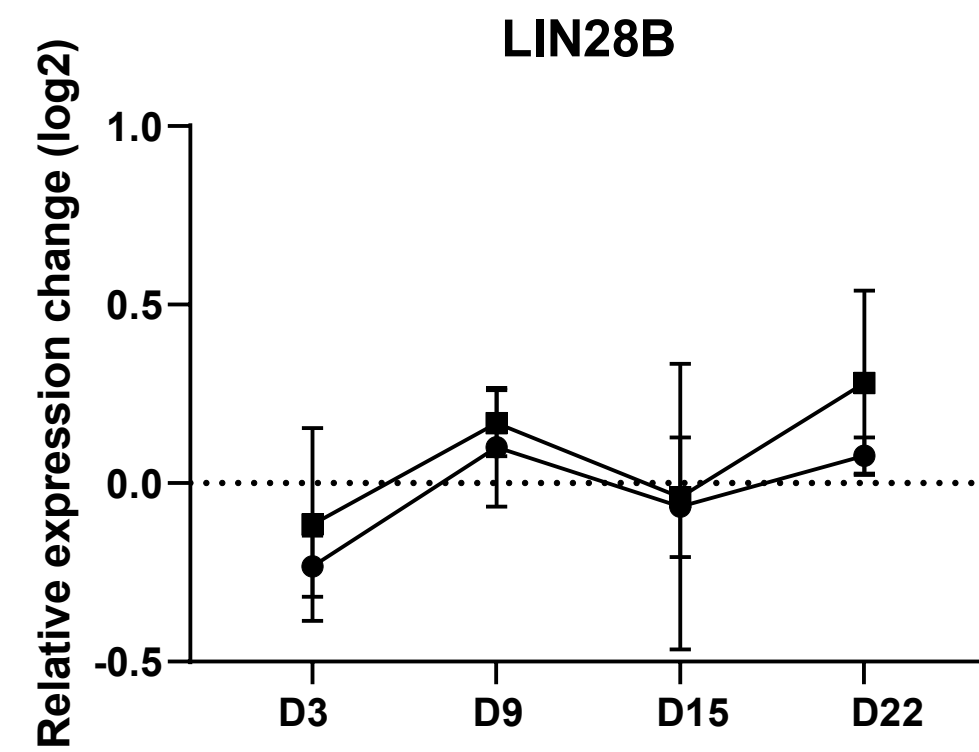

Supplement: 13229_2020_344_MOESM3_ESM.pdf [file 13229_2020_344_MOESM3_ESM.pdf]
